# Supplementary material for: MLL1 is essential for the senescence-associated secretory phenotype
Source: PubMed Central journal article supplement — Genes Dev. 2016 Feb 1;30(3):321–36. doi: 10.1101/gad.271882.115 (PMC4743061; doi:10.1101/gad.271882.115), 2016-02-01
Supplement: supp_30.3.321_SuppFig6.pdf [file supp_30.3.321_SuppFig6.pdf]

A

| GO biological process                                                                    | Observed | Expected | Fold enrichment | P-value  |
|------------------------------------------------------------------------------------------|----------|----------|-----------------|----------|
| regulation of chromosome segregation                                                     | 10       | 1.23     | > 5             | 4.95E-03 |
| anaphase-promoting complex-dependent proteasomal ubiquitin-dependent protein catabolic p | 12       | 1.48     | > 5             | 3.87E-04 |
| mitotic prometaphase                                                                     | 14       | 1.76     | > 5             | 3.92E-05 |
| sister chromatid segregation                                                             | 10       | 1.44     | > 5             | 2.04E-02 |
| DNA packaging                                                                            | 19       | 2.79     | > 5             | 9.51E-07 |

B

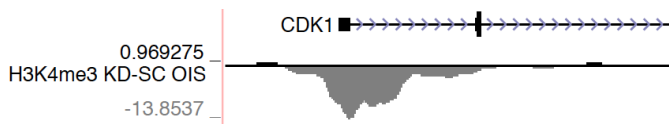

C

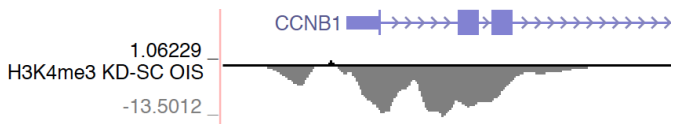

D

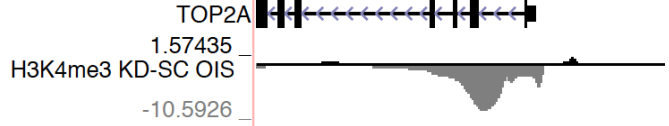

E

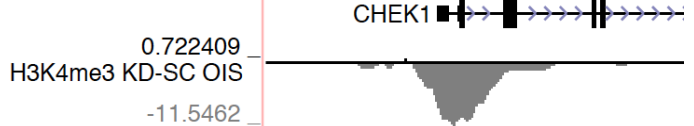

F

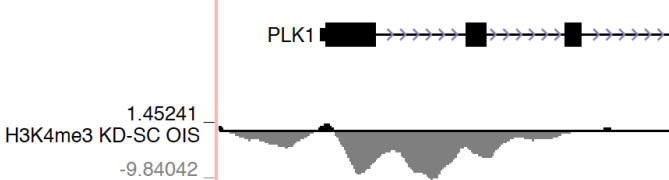

G

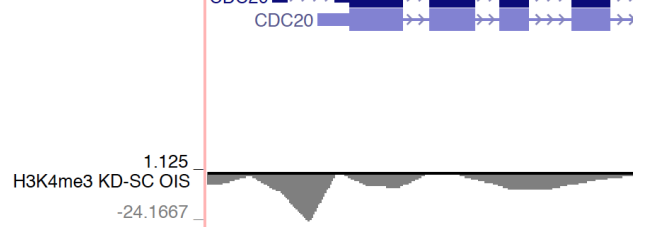

H

| GO biological process                                           | Observed | Expected | Fold enrichment | P-value  |
|-----------------------------------------------------------------|----------|----------|-----------------|----------|
| mitotic spindle elongation                                      | 5        | 0.17     | > 5             | 8.98E-03 |
| spindle elongation                                              | 5        | 0.2      | > 5             | 1.59E-02 |
| regulation of attachment of spindle microtubules to kinetochore | 5        | 0.24     | > 5             | 4.18E-02 |
| histone-serine phosphorylation                                  | 5        | 0.24     | > 5             | 4.18E-02 |
| microtubule cytoskeleton organization involved in mitosis       | 10       | 0.59     | > 5             | 5.89E-06 |

I

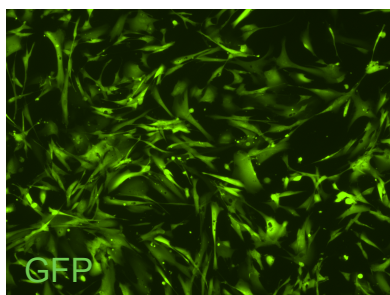

Control

J

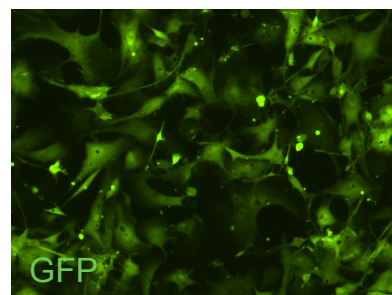

OIS
