# Supplementary material for: MLL1 is essential for the senescence-associated secretory phenotype
Source: PubMed Central journal article supplement — Genes Dev. 2016 Feb 1;30(3):321–36. doi: 10.1101/gad.271882.115 (PMC4743061; doi:10.1101/gad.271882.115), 2016-02-01
Supplement: supp_30.3.321_SuppTable1.pdf [file supp_30.3.321_SuppTable1.pdf]

**Table 1: Most dynamically changing genes with MLL1 inhibition in OIS**

|           | Fold increase with OIS induction | Fold decrease with MLL1 KD in OIS |
|-----------|----------------------------------|-----------------------------------|
| ACP5      | 1.740921408                      | 1.850151049                       |
| ACSL5     | 1.654779543                      | 1.583101346                       |
| AGO2      | 2.26825127                       | 1.712279959                       |
| AGTR1     | 1.515391309                      | 1.705220035                       |
| AKAP12    | 3.085014449                      | 1.582736611                       |
| AKR1B1    | 1.623835711                      | 1.662932423                       |
| AMPD3     | 4.916892624                      | 1.587113784                       |
| ANKRD39   | 1.582291423                      | 1.928465427                       |
| ANPEP     | 4.642876867                      | 1.59024704                        |
| AREG      | 20.82904419                      | 1.727680529                       |
| ARID3A    | 1.595036468                      | 1.616782412                       |
| ASB2      | 2.379232863                      | 1.966808524                       |
| ATF3      | 2.576535699                      | 2.19459965                        |
| ATP2B1    | 1.74474541                       | 1.597336524                       |
| ATP5J2-PT | 1.583624564                      | 1.52581227                        |
| ATP6V0D2  | 2.962563811                      | 1.931651894                       |
| B3GNT5    | 2.053206857                      | 1.58300849                        |
| BAALC     | 2.41544151                       | 1.53033987                        |
| BCL2A1    | 19.25082998                      | 3.762738244                       |
| BIRC3     | 2.939613851                      | 1.715893321                       |
| BTN2A2    | 2.819198084                      | 1.878388614                       |
| C18orf32  | 1.530121396                      | 1.561882462                       |
| C2CD2     | 3.844550609                      | 1.571969819                       |
| C4orf26   | 2.889588926                      | 1.816082218                       |
| C9orf72   | 1.75372513                       | 1.608789595                       |
| CCDC148   | 1.98651347                       | 1.551014522                       |
| CCDC19    | 2.249652514                      | 1.62711416                        |
| CCL20     | 15.96705141                      | 3.544619689                       |
| CCL3      | 3.071955745                      | 1.694125745                       |
| CD274     | 1.89832359                       | 1.526814018                       |
| CD69      | 2.110716145                      | 1.605330326                       |
| CD9       | 2.229767999                      | 1.651289582                       |
| CD97      | 2.294122848                      | 1.506495299                       |
| CDR2L     | 1.692321029                      | 1.527103531                       |
| CEBPD     | 1.75565793                       | 1.901707538                       |
| CHRNA1    | 2.961065788                      | 1.603159786                       |
| CHST2     | 6.592431445                      | 1.509480844                       |
| CLDN14    | 1.728997595                      | 1.715034344                       |
| CLIP2     | 1.839854683                      | 1.69102744                        |
| CMTM1     | 1.509141504                      | 1.832287025                       |

|          |             |             |
|----------|-------------|-------------|
| COL10A1  | 4.340131914 | 3.39946281  |
| CORO2B   | 2.810054061 | 1.565805717 |
| CSF2     | 3.274011375 | 2.319210371 |
| CSF3     | 3.05958     | 1.947052007 |
| CSTA     | 1.590165003 | 1.860872429 |
| CTSS     | 7.749503056 | 2.814422069 |
| CXCL1    | 13.92948127 | 5.260733316 |
| CXCL2    | 7.477863085 | 4.70100156  |
| CXCL3    | 10.53051863 | 6.165937035 |
| CXCL5    | 33.08167777 | 14.71234556 |
| CYBA     | 1.82102102  | 1.583814759 |
| CYSTM1   | 1.889218092 | 1.868824157 |
| DBNDD1   | 1.914577197 | 1.65499618  |
| DDIT4L   | 2.263964026 | 1.844500747 |
| DIRAS3   | 5.084319127 | 1.748179456 |
| DTX2     | 1.647738604 | 1.575740327 |
| EREG     | 14.48925135 | 1.726634385 |
| ETS2     | 2.199849686 | 1.538873724 |
| ETV4     | 2.569779271 | 1.527096102 |
| EXOSC4   | 2.493378707 | 1.642885403 |
| F2RL1    | 3.540826697 | 1.986851085 |
| FAM72D   | 1.5502494   | 1.550343711 |
| FCER1G   | 1.560614862 | 1.551280936 |
| FERMT1   | 1.70186961  | 1.764394294 |
| FJX1     | 1.980344386 | 1.530461393 |
| G0S2     | 8.504481251 | 1.911825237 |
| GAL      | 2.334457823 | 1.773024448 |
| GDF15    | 4.445321852 | 1.831287706 |
| GDNF     | 1.786548354 | 1.593462431 |
| GEM      | 1.905215247 | 1.502236666 |
| GK       | 3.131877152 | 2.090869741 |
| GK3P     | 2.94271436  | 1.982134436 |
| GNG11    | 1.89341196  | 1.782425569 |
| GNG2     | 1.649645989 | 1.960528002 |
| GPR183   | 1.788463776 | 1.580247333 |
| GPR68    | 3.296558014 | 1.687853023 |
| HAPLN4   | 2.2180426   | 3.105169981 |
| HEPHL1   | 2.027080643 | 1.513111586 |
| HGF      | 3.617754417 | 1.99564684  |
| HS3ST3A1 | 1.576295542 | 1.560616715 |
| ICAM1    | 8.847681292 | 2.097771918 |
| ICAM5    | 1.561284774 | 1.51227434  |

|           |             |             |
|-----------|-------------|-------------|
| IER3      | 2.633780877 | 1.955571059 |
| IFI6      | 3.108607185 | 4.871273207 |
| IGDCC4    | 1.559738656 | 1.779567227 |
| IGFBP5    | 1.547833385 | 1.535174649 |
| IL11      | 2.269989217 | 1.520515242 |
| IL13RA2   | 4.273774692 | 2.140299858 |
| IL1A      | 20.18521317 | 2.950792261 |
| IL1B      | 140.1460401 | 4.865249333 |
| IL31RA    | 1.553895385 | 1.625692895 |
| IL32      | 1.694848961 | 1.668040532 |
| IL6       | 3.808422476 | 3.320160771 |
| IL8       | 73.04825687 | 8.22438835  |
| IRAK2     | 2.757320612 | 1.524167573 |
| ISG15     | 1.795821594 | 2.707775344 |
| ITGA1     | 3.356029695 | 1.76024522  |
| ITGB3     | 1.887878681 | 1.585007324 |
| ITPKA     | 2.706582965 | 1.722479947 |
| IVL       | 7.521109573 | 1.674971906 |
| KCNG1     | 2.749935237 | 1.818028879 |
| KCNH6     | 2.107845376 | 1.568873815 |
| KCNJ15    | 4.121315671 | 1.797314235 |
| KRTAP2-2  | 1.510369774 | 1.504315361 |
| KYNU      | 8.878995469 | 1.74052361  |
| LAIR2     | 3.09561     | 1.634680072 |
| LCE1C     | 2.50972     | 1.880106257 |
| LCE1D     | 3.60245     | 2.540817629 |
| LCE1F     | 36.9826     | 3.830913025 |
| LCE2A     | 16.27704965 | 2.805025585 |
| LCE2B     | 4.037539863 | 1.905407584 |
| LCE2C     | 19.71825429 | 2.86915987  |
| LCE2D     | 4.00443     | 2.498142502 |
| LCE3D     | 5.4243      | 2.447722535 |
| LCE3E     | 4.41864     | 4.134945136 |
| LDB2      | 1.555751586 | 1.538958272 |
| LINC00520 | 1.77401095  | 1.570872546 |
| LOC100126 | 1.712358341 | 1.64154594  |
| LOC100129 | 2.725469471 | 1.932039525 |
| LOC100506 | 2.75603893  | 1.678534896 |
| LOC643733 | 1.68335368  | 1.640332278 |
| LPXN      | 2.485330697 | 1.840020777 |
| LYPLA1    | 2.493393694 | 1.607554662 |
| MAFF      | 2.333901916 | 1.881193611 |

|         |             |             |
|---------|-------------|-------------|
| MAN1A1  | 2.351808428 | 2.231408621 |
| MDH2    | 1.68511896  | 1.581469551 |
| MFSD2A  | 2.088668173 | 1.573045279 |
| MLKL    | 2.43690405  | 1.91606503  |
| MMP1    | 9.819913196 | 2.098904233 |
| MMP10   | 4.780627881 | 2.896565657 |
| MMP3    | 25.10428941 | 3.000967388 |
| MMP7    | 5.968903585 | 2.138964838 |
| MRGPRX3 | 8.021513483 | 1.737093416 |
| MRPL15  | 1.909141649 | 1.582990643 |
| MT1H    | 1.635418254 | 1.64579048  |
| MX1     | 1.608865118 | 2.4687697   |
| MYCT1   | 2.341638419 | 2.343922244 |
| NAMPT   | 3.527513679 | 1.834005674 |
| NBL1    | 1.601807531 | 1.613757345 |
| NDP     | 4.339871604 | 1.810673185 |
| NETO1   | 1.785691797 | 1.530742671 |
| NFKBIA  | 2.491850059 | 1.647308691 |
| NPC1    | 1.73816252  | 1.672157083 |
| NPIPA2  | 2.042034144 | 1.606313465 |
| NR4A3   | 3.20998647  | 1.901693531 |
| NRG1    | 3.110838193 | 1.550986816 |
| NRIP3   | 3.321855648 | 2.077314353 |
| NRROS   | 1.805535439 | 1.550410457 |
| NUDT4P2 | 1.918224756 | 2.759581058 |
| OLAH    | 3.281744878 | 2.269787873 |
| PAQR3   | 1.741426818 | 1.93241898  |
| PDE4B   | 3.092380114 | 1.952082266 |
| PHLDA2  | 2.288407327 | 1.846671655 |
| PINLYP  | 1.500865748 | 1.528673118 |
| PLEK2   | 4.46021271  | 1.765942    |
| PMAIP1  | 1.986602228 | 1.645851606 |
| PNP     | 4.376124218 | 1.936813187 |
| POU2F2  | 8.015054363 | 2.081824765 |
| PQLC2   | 1.577958451 | 1.597866722 |
| PRKD3   | 3.96743059  | 1.639714219 |
| PROCR   | 1.6694921   | 1.70099576  |
| PTGS2   | 4.903668937 | 2.952189257 |
| QPCT    | 5.728377736 | 2.061529911 |
| RAB31   | 2.453596014 | 1.950327929 |
| RAB38   | 1.810057933 | 1.775551109 |
| RAC2    | 2.400365631 | 1.596380849 |

|          |             |             |
|----------|-------------|-------------|
| RALA     | 1.940248599 | 2.801273969 |
| RBP1     | 1.613579909 | 1.787735882 |
| RELB     | 1.898835082 | 1.700743338 |
| RGS17    | 3.552103666 | 1.559943984 |
| RGS20    | 1.995909644 | 1.930596673 |
| ROBO4    | 3.180635774 | 2.086876683 |
| RPLP0P2  | 2.528684194 | 2.013926474 |
| RPS6KA3  | 1.718074347 | 1.593347134 |
| SAA1     | 8.269770946 | 1.602780589 |
| SAA2     | 4.561982569 | 1.712001048 |
| SAA4     | 1.76187     | 1.528220385 |
| SCG5     | 5.553871367 | 3.207024295 |
| SCO2     | 1.563244299 | 1.728242789 |
| SEMA7A   | 3.608235395 | 1.653725684 |
| SERPINA1 | 3.440402131 | 1.5777332   |
| SERPINA9 | 4.765599624 | 2.564388078 |
| SERPINB2 | 2.612571024 | 2.625028719 |
| SERPINB4 | 1.90958121  | 1.68896934  |
| SLC2A13  | 1.681575671 | 1.50136651  |
| SLC35E4  | 2.29304009  | 1.786513155 |
| SLC43A3  | 2.355120247 | 2.061613849 |
| SLC6A15  | 20.67675925 | 2.049803476 |
| SMAD1    | 2.808289715 | 1.833974181 |
| SMAGP    | 1.664808292 | 1.617078163 |
| SNCB     | 2.306968257 | 1.898971223 |
| SNX15    | 2.076730643 | 2.076266101 |
| SOCS2-AS | 1.696743989 | 1.636638667 |
| SOD2     | 3.46551244  | 2.643823053 |
| SOX11    | 1.624275527 | 1.7261526   |
| SPHK1    | 2.461082044 | 1.697260032 |
| SPSB1    | 3.743700646 | 1.521551536 |
| SPX      | 2.127633249 | 3.181853765 |
| SQRDL    | 2.481598324 | 1.64076594  |
| SRGAP2B  | 3.078565293 | 1.874890149 |
| STC1     | 14.02816183 | 1.551137468 |
| STEAP1   | 2.952303488 | 2.314890564 |
| STEAP1B  | 1.842612317 | 1.642166638 |
| TAGLN3   | 18.44764469 | 3.675053804 |
| TFPI2    | 5.990879174 | 3.197866836 |
| TM4SF19  | 1.926105816 | 2.154892959 |
| TMCC3    | 2.492771646 | 1.753337728 |
| TMEM156  | 7.123467543 | 1.861541732 |

|          |             |             |
|----------|-------------|-------------|
| TMEM233  | 1.782354969 | 1.580757226 |
| TNC      | 2.304381045 | 1.739262702 |
| TNFAIP2  | 2.431775152 | 1.887360456 |
| TNFAIP3  | 2.688242066 | 2.068131963 |
| TNFRSF1B | 1.927172327 | 1.98370085  |
| TNFSF15  | 32.96514614 | 3.935256573 |
| TNIP1    | 2.025032758 | 1.508915856 |
| TRAF1    | 1.848701087 | 2.104967869 |
| TRPA1    | 3.100968602 | 1.536555242 |
| TTLL5    | 1.836318266 | 1.557362501 |
| UPP1     | 2.436002752 | 1.992290735 |
| VGFB     | 4.775787835 | 1.9600593   |
| WNT7B    | 5.681504868 | 2.827202885 |
| ZC3H12A  | 4.476142539 | 1.850831986 |
| ZEB1     | 1.888949337 | 1.610487368 |
| ZNF438   | 2.109559433 | 2.149647895 |
