# Supplementary figures and images for: MLL1 is essential for the senescence-associated secretory phenotype
Source: PubMed Central journal article supplement — Genes Dev. 2016 Feb 1;30(3):321–36. doi: 10.1101/gad.271882.115 (PMC4743061; doi:10.1101/gad.271882.115), 2016-02-01

# Capell\_SuppFig1

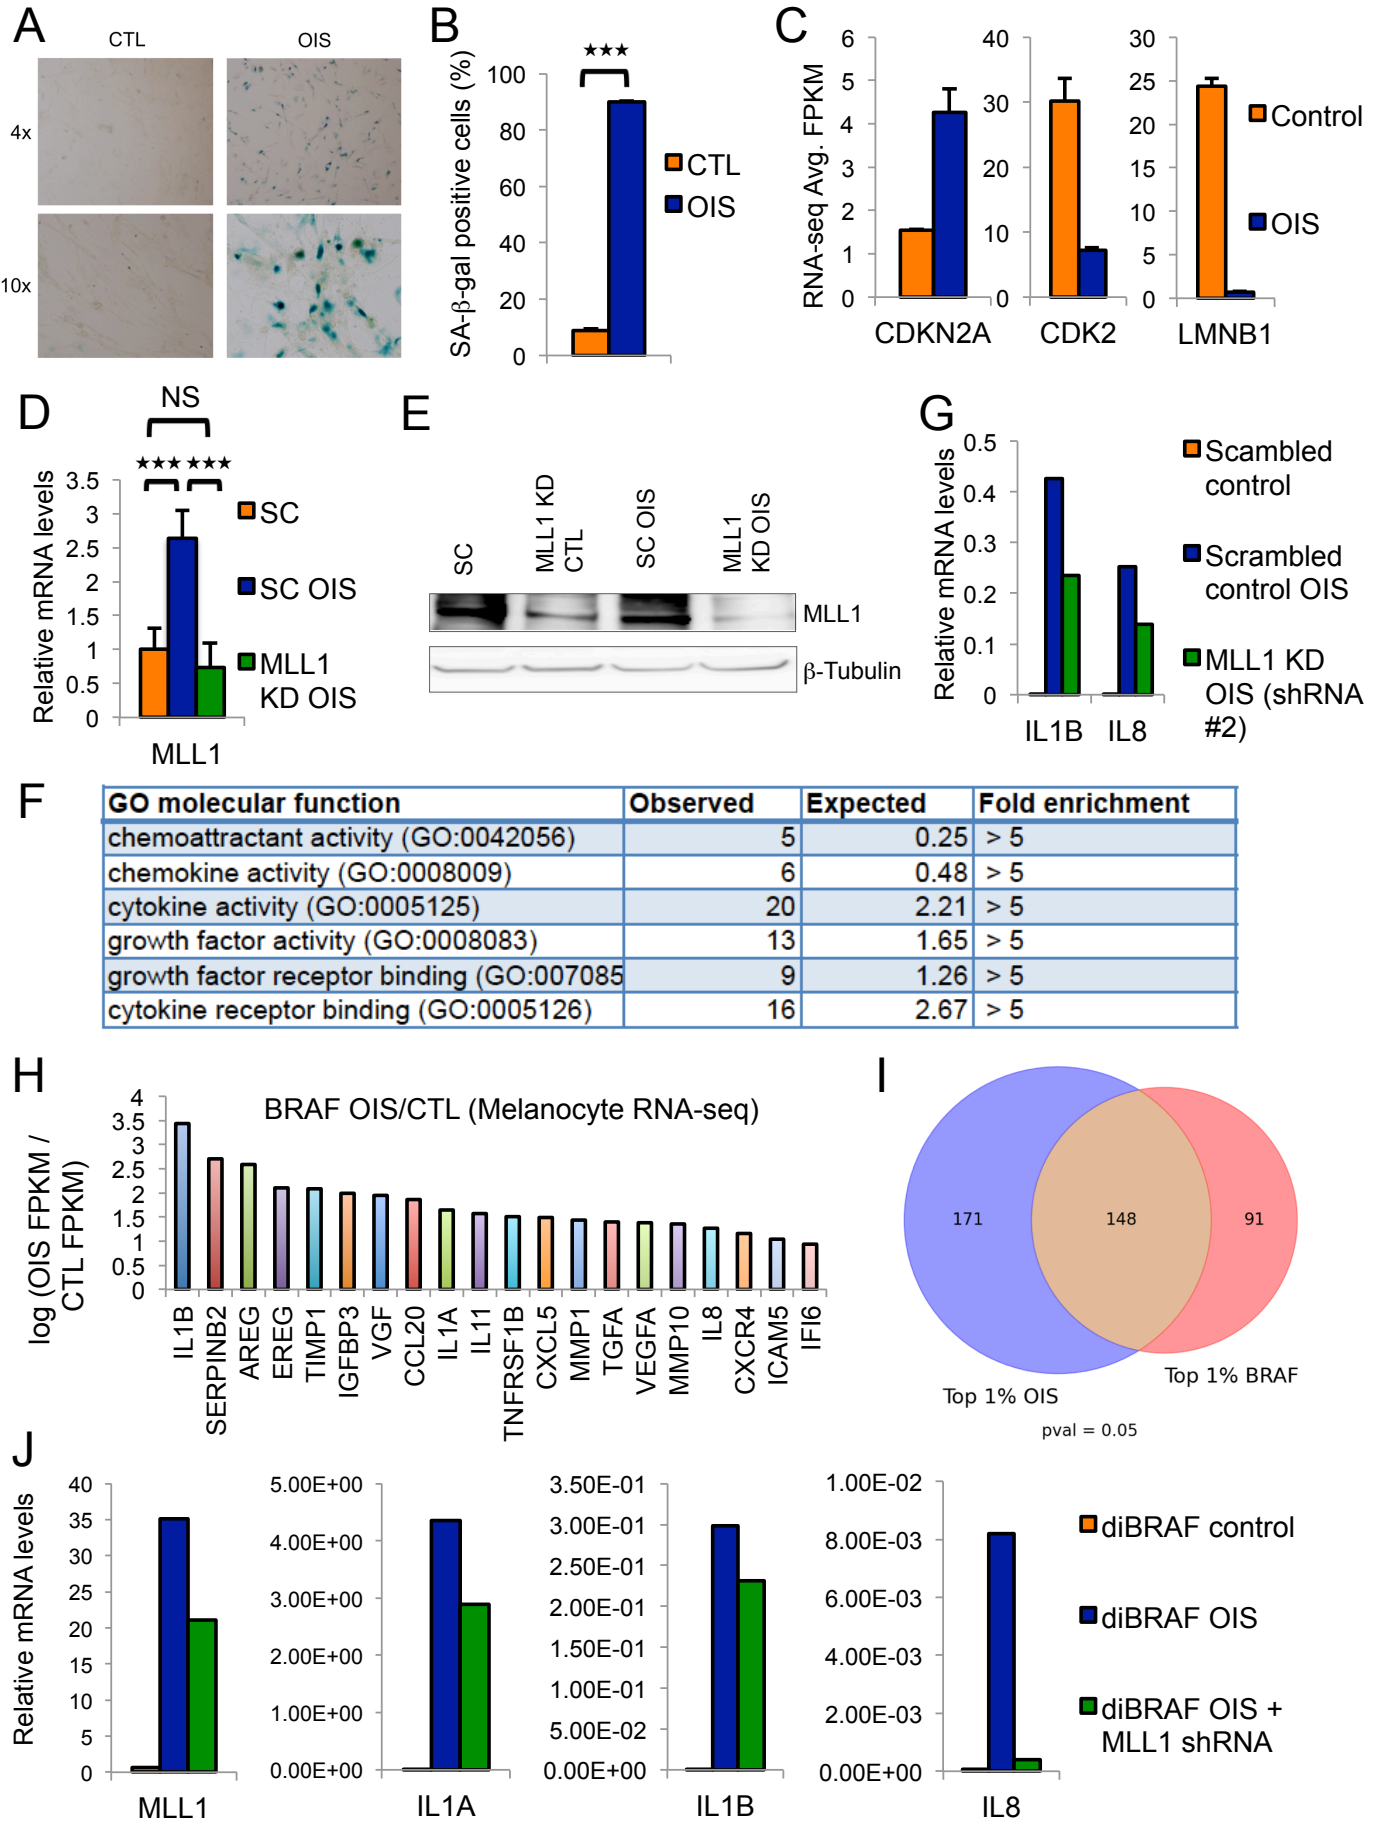

Supplement: supp_30.3.321_SuppFig1.pdf [file supp_30.3.321_SuppFig1.pdf]

# Capell\_SuppFig2

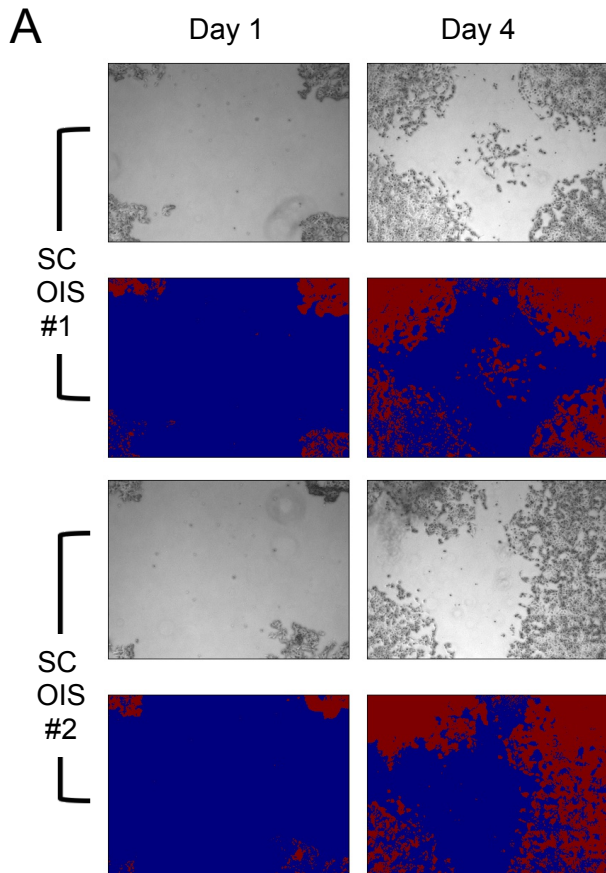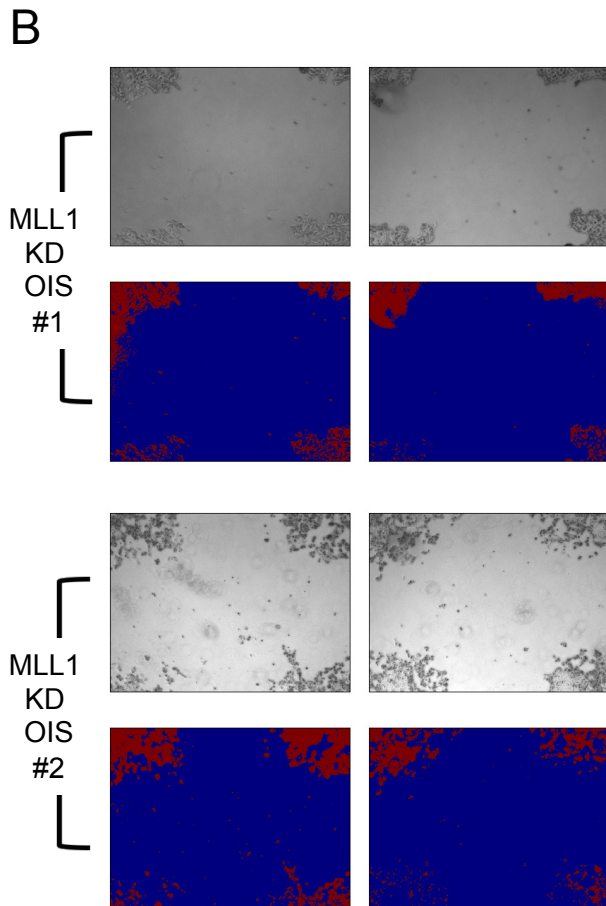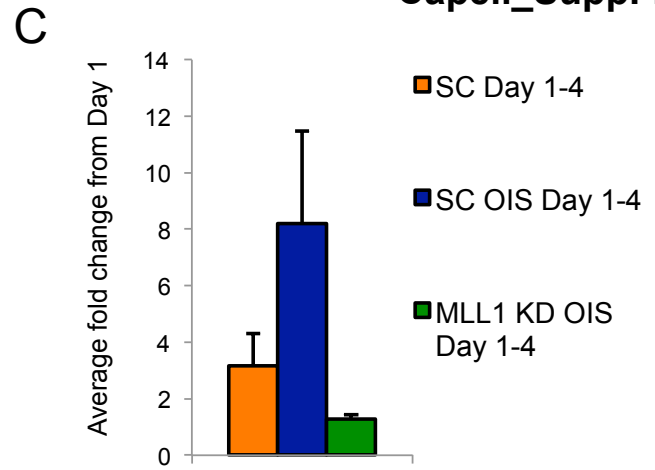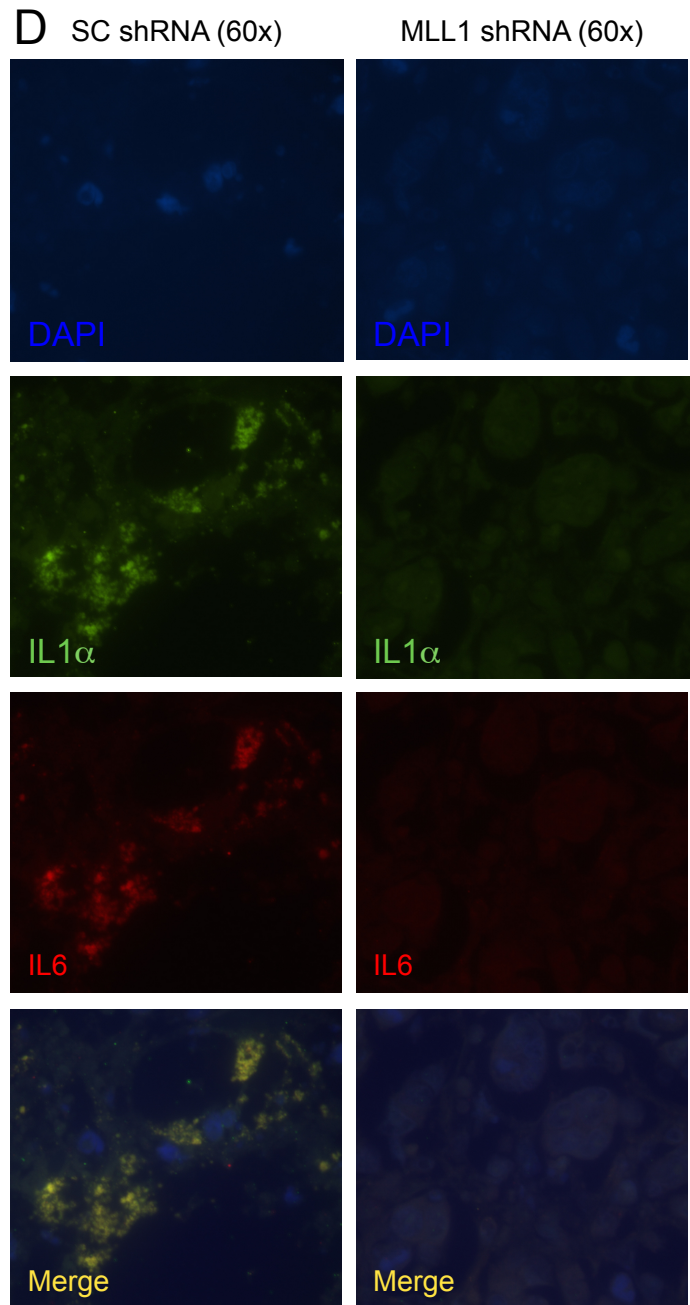

Supplement: supp_30.3.321_SuppFig2.pdf [file supp_30.3.321_SuppFig2.pdf]

A

Breast Cancer

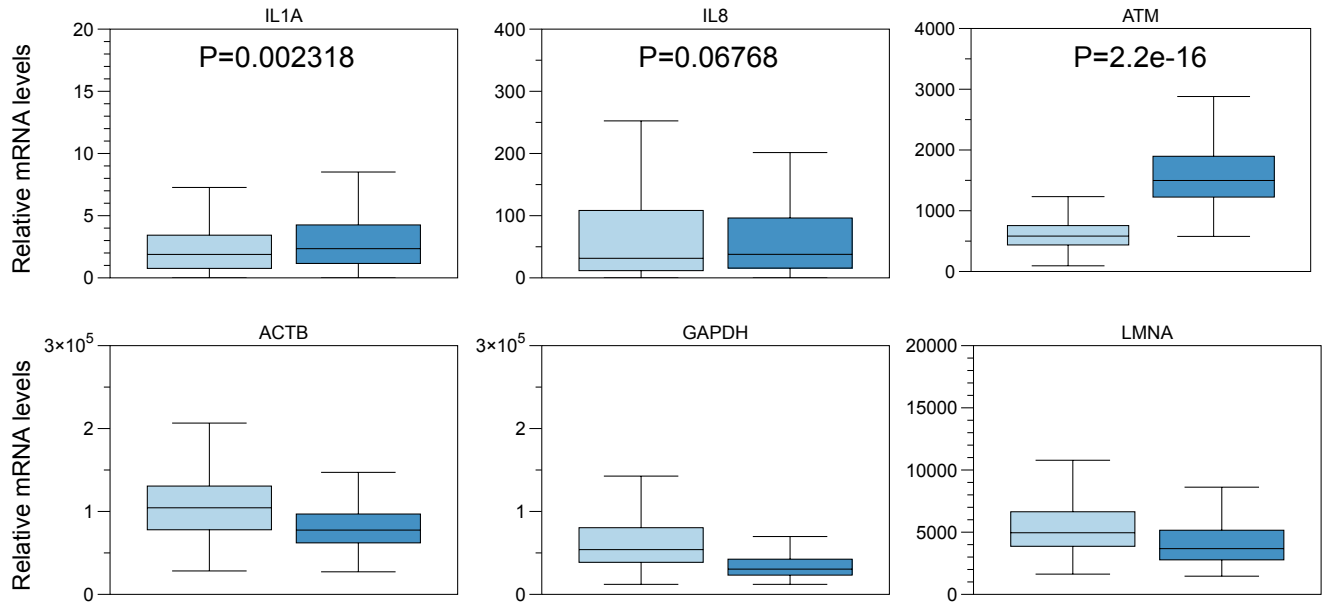

B

Prostate Cancer

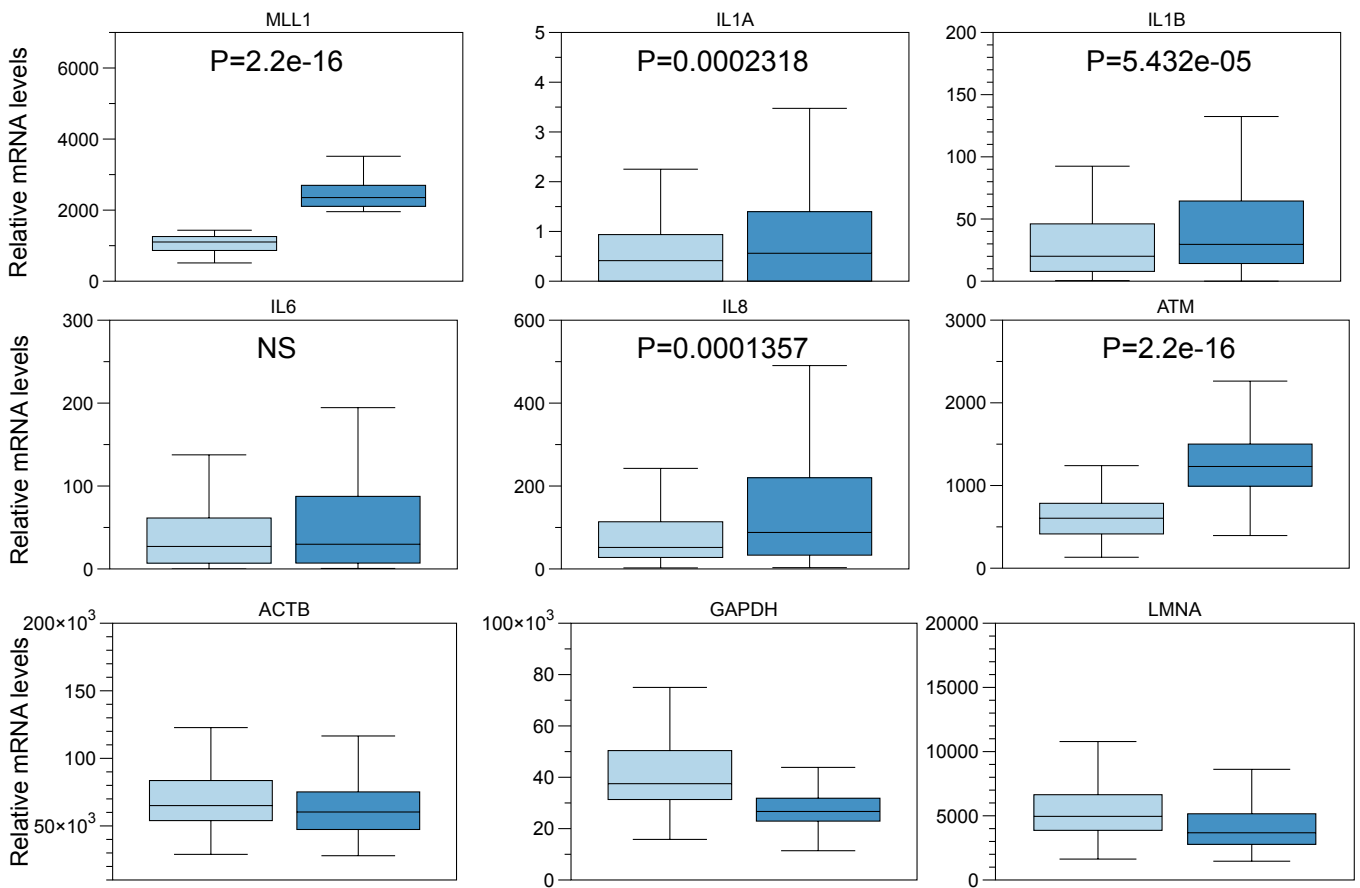

Lowest 1/3 MLL1 expression

Highest 1/3 MLL1 expression

Supplement: supp_30.3.321_SuppFig3.pdf [file supp_30.3.321_SuppFig3.pdf]

A

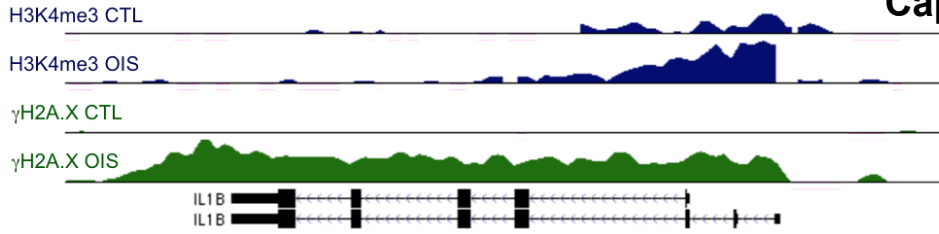

B

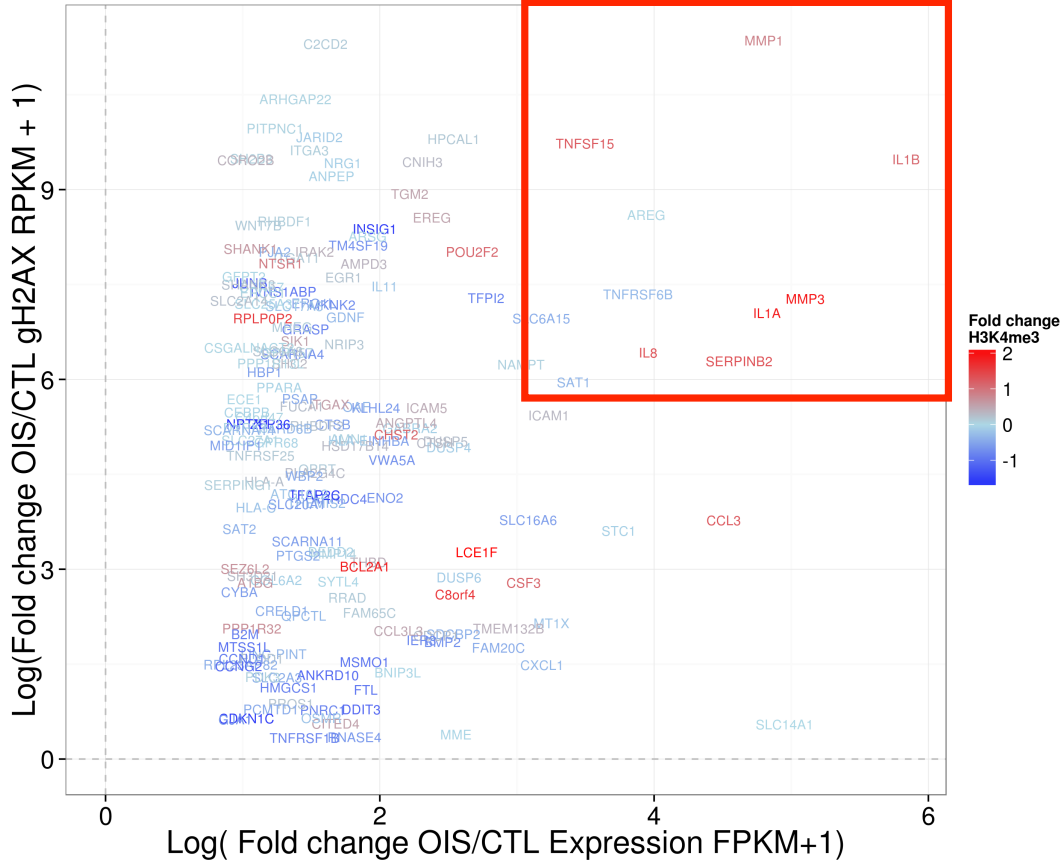

C

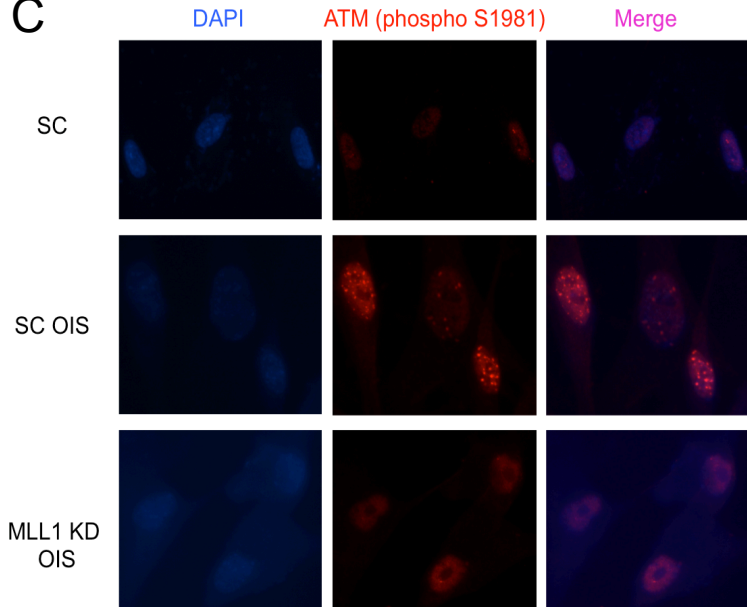

D

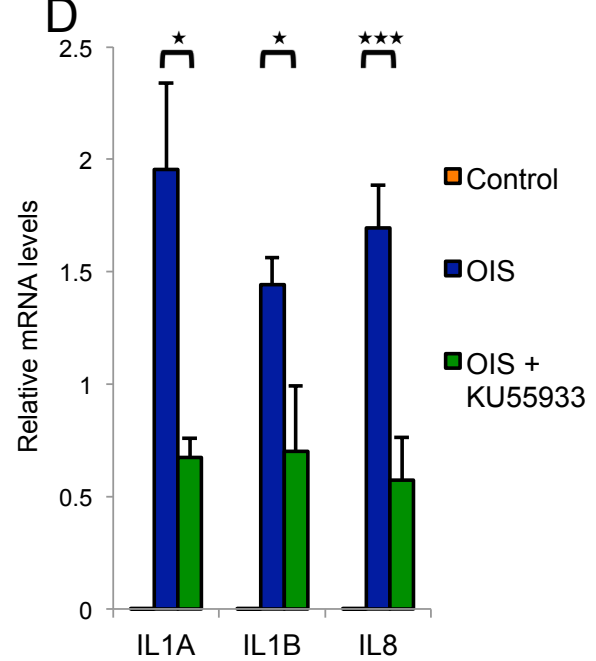

Supplement: supp_30.3.321_SuppFig4.pdf [file supp_30.3.321_SuppFig4.pdf]

**A** Correlation of MLL1(KMT2A) with ATM across TCGA RNAseq datasets

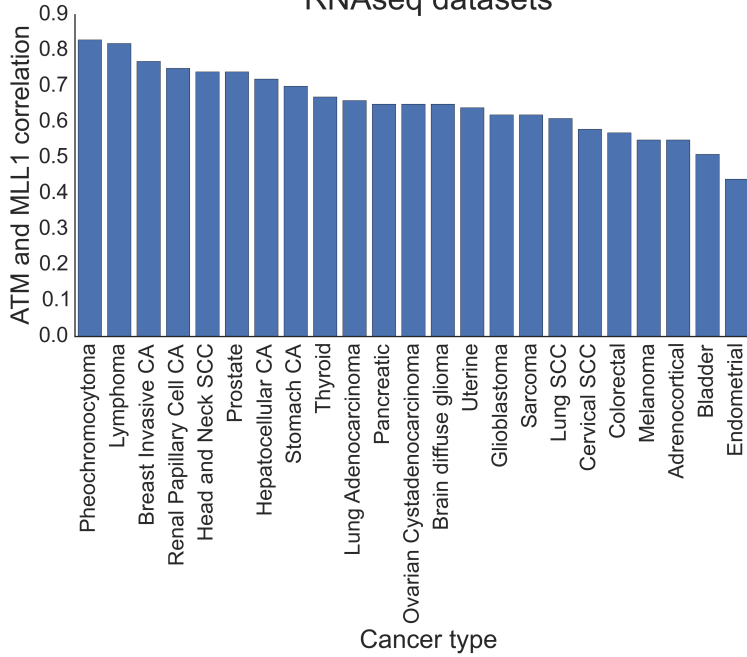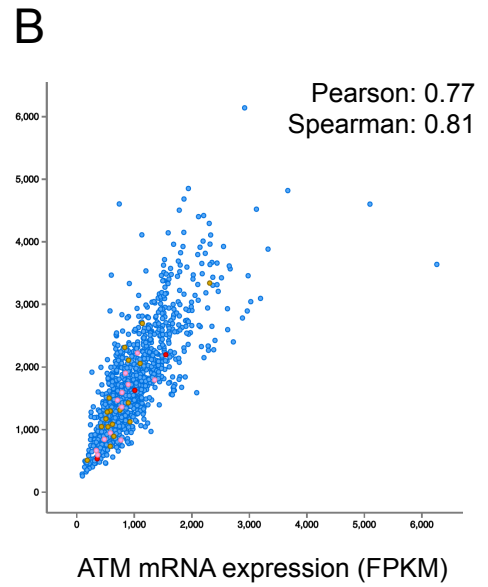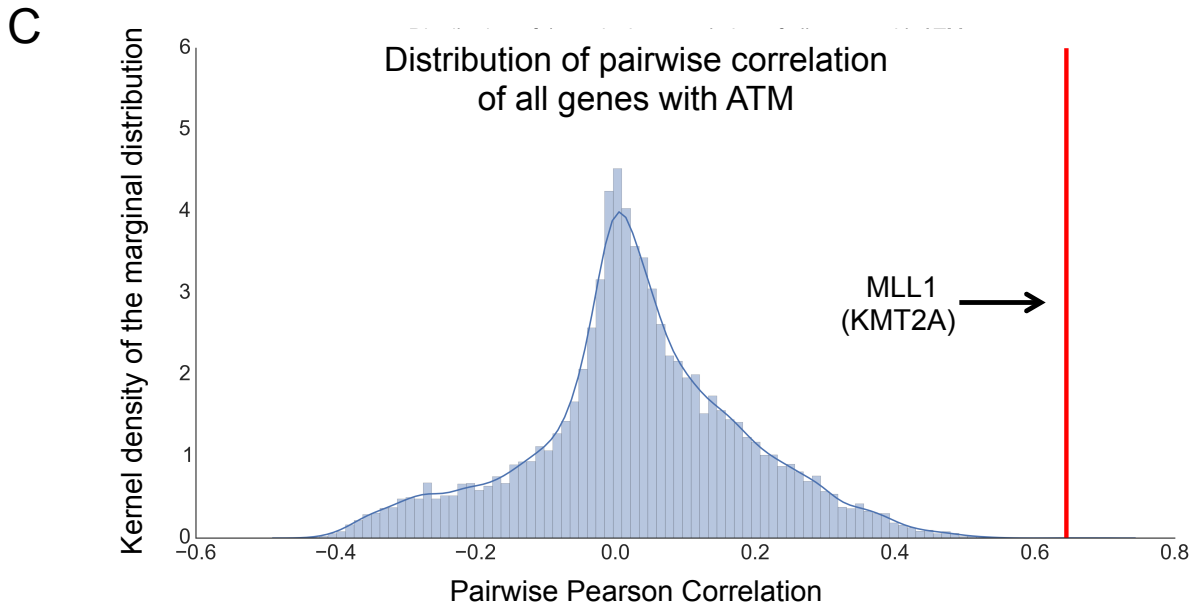

Supplement: supp_30.3.321_SuppFig5.pdf [file supp_30.3.321_SuppFig5.pdf]
